# Supplementary material for: Potential Range Map Dataset of Indian Birds
Source: MDPI journal article supplement (doi:10.3390/data8090144), 2023-09-21
Supplement: s1 [file s1]

## **Supplementary S2**

**Summary:**

**Table S1. List of Environmental Variables**

**Figure S1. Bias correction results for presence data using sampbias packages.**

**Table S1. List of Environmental Variables**

| <b>Environment Variable</b> | <b>Brief Description</b>                                   | <b>Category</b>       | <b>Source</b> |
|-----------------------------|------------------------------------------------------------|-----------------------|---------------|
| BIO1                        | Annual Mean Temperature                                    | Bioclimatic Variables | [2]           |
| BIO2                        | Mean Diurnal Range (Mean of monthly (max temp - min temp)) | Bioclimatic Variables | [2]           |
| BIO3                        | Isothermality (BIO2/BIO7) (×100)                           | Bioclimatic Variables | [2]           |
| BIO4                        | Temperature Seasonality (standard deviation ×100)          | Bioclimatic Variables | [2]           |
| BIO5                        | Max Temperature of Warmest Month                           | Bioclimatic Variables | [2]           |
| BIO6                        | Min Temperature of Coldest Month                           | Bioclimatic Variables | [2]           |
| BIO7                        | Temperature Annual Range (BIO5-BIO6)                       | Bioclimatic Variables | [2]           |
| BIO8                        | Mean Temperature of Wettest Quarter                        | Bioclimatic Variables | [2]           |
| BIO9                        | Mean Temperature of Driest Quarter                         | Bioclimatic Variables | [2]           |
| BIO10                       | Mean Temperature of Warmest Quarter                        | Bioclimatic Variables | [2]           |
| BIO11                       | Mean Temperature of Coldest Quarter                        | Bioclimatic Variables | [2]           |
| BIO12                       | Annual Precipitation                                       | Bioclimatic Variables | [2]           |
| BIO13                       | Precipitation of Wettest Month                             | Bioclimatic Variables | [2]           |
| BIO14                       | Precipitation of Driest Month                              | Bioclimatic Variables | [2]           |
| BIO15                       | Precipitation Seasonality (Coefficient of Variation)       | Bioclimatic Variables | [2]           |
| BIO16                       | Precipitation of Wettest Quarter                           | Bioclimatic Variables | [2]           |
| BIO17                       | Precipitation of Driest Quarter                            | Bioclimatic Variables | [2]           |
| BIO18                       | Precipitation of Warmest Quarter                           | Bioclimatic Variables | [2]           |
| BIO19                       | Precipitation of Coldest Quarter                           | Bioclimatic Variables | [2]           |
| er_PETColdestQuarter        | mean monthly PET of coldest quarter                        | EnviREM Variables     | [3]           |

|                      |                                                     |                       |                   |
|----------------------|-----------------------------------------------------|-----------------------|-------------------|
| er_PETDriestQuarter  | mean monthly PET of driest quarter                  | EnviREM Variables     | [3]               |
| er_PETseasonality    | monthly variability in potential evapotranspiration | EnviREM Variables     | [3]               |
| er_PETWarmestQuarter | mean monthly PET of warmest quarter                 | EnviREM Variables     | [3]               |
| er_PETWettestQuarter | mean monthly PET of wettest quarter                 | EnviREM Variables     | [3]               |
| ele_Aspect           | Aspect                                              | Topographic Variables | Derived using [2] |
| ele_Elevation        | Elevation                                           | Topographic Variables | [2]               |
| ele_TWI              | Topographic wetness index                           | Topographic Variables | [3]               |
| ele_TRI              | Terrain roughness index                             | Topographic Variables | [3]               |
| ele_Slope            | Slope                                               | Topographic Variables | Derived using [2] |

**Figure S1. Bias correction results for presence data using “sambias” packages.**

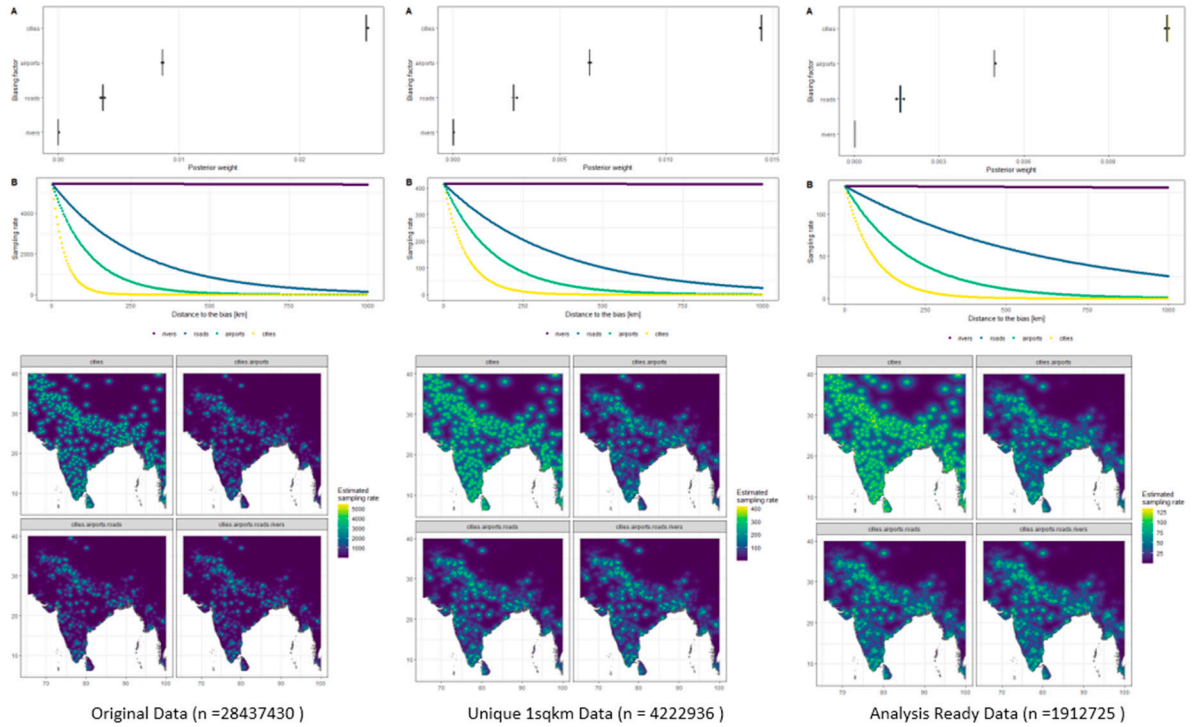

We obtained the following bias weights of cities =  $2.551440\text{e-}02 \pm 4.130647\text{e-}05$ , rivers =  $8.432725\text{e-}06 \pm 3.715149\text{e-}06$ , and roads =  $3.699871\text{e-}03 \pm 5.759420\text{e-}05$ , while for the final analysis-ready data we obtained following bias weights of cities =  $1.107066\text{e-}02 \pm 2.315558\text{e-}05$ , rivers =  $1.573538\text{e-}05 \pm 8.218483\text{e-}06$ , and roads =  $1.618656\text{e-}03 \pm 4.402534\text{e-}05$  with default settings of “sambias” package. This result indicates that our final analysis-ready data had a lower level of sampling bias compared to the original data.

## References:

1. Dinerstein, E.; Olson, D.; Joshi, A.; Vynne, C.; Burgess, N.D.; Wikramanayake, E.; Hahn, N.; Palminteri, S.; Hedao, P.; Noss, R.; et al. An Ecoregion-Based Approach to Protecting Half the Terrestrial Realm. *BioScience* **2017**, *67*, 534–545, doi:10.1093/BIOSCI/BIX014.
2. Hijmans, R.J.; Cameron, S.E.; Parra, J.L.; Jones, P.G.; Jarvis, A. Very High Resolution Interpolated Climate Surfaces for Global Land Areas. *International Journal of Climatology* **2005**, *25*, 1965–1978, doi:10.1002/joc.1276.
3. Title, P.O.; Bemmels, J.B. ENVIREM: An Expanded Set of Bioclimatic Variables Improves Ecological Niche Modeling Performance. *In preparation for submission to Methods in Ecology and Evolution* **2016**, 1–48, doi:10.1101/075200.
